# Supplementary material for: Benefit of adjuvant chemotherapy based on lymph node involvement for oesophageal cancer following trimodality therapy
Source: PubMed Central journal article supplement — ESMO Open. 2018 Jul 25;3(5):e000386. doi: 10.1136/esmoopen-2018-000386 (PMC6069924; doi:10.1136/esmoopen-2018-000386), 2018-07-25
Supplement: esmoopen-2018-000386supp001.pdf [file esmoopen-2018-000386supp001.pdf]

**Supplementary Table 1.** Cox regression analysis for overall cohort

|                                   | Overall Cohort          |           |      |         |                           |           |      |         |
|-----------------------------------|-------------------------|-----------|------|---------|---------------------------|-----------|------|---------|
|                                   | Cox Univariate Analysis |           |      |         | Cox Multivariate Analysis |           |      |         |
|                                   | HR                      | 95% CI    |      | p-value | HR                        | 95% CI    |      | p-value |
| <b>Age at Diagnosis</b>           |                         |           |      |         |                           |           |      |         |
| Per year increase                 | 1.01                    | 1.01      | 1.02 | 0.000   | 1.02                      | 1.01      | 1.02 | 0.000   |
| <b>Gender</b>                     |                         |           |      |         |                           |           |      |         |
| Male                              | 1.00                    | Reference |      |         | 1.00                      | Reference |      |         |
| Female                            | 0.86                    | 0.78      | 0.95 | 0.002   | 0.88                      | 0.77      | 0.99 | 0.034   |
| <b>Charlson Comorbidity Score</b> |                         |           |      |         |                           |           |      |         |
| 0                                 | 1.00                    | Reference |      |         | 1.00                      | Reference |      |         |
| 1                                 | 1.14                    | 1.06      | 1.24 | 0.001   | 1.12                      | 1.02      | 1.24 | 0.017   |
| ≥ 2                               | 1.29                    | 1.11      | 1.49 | 0.001   | 1.35                      | 1.13      | 1.61 | 0.001   |
| <b>Grade</b>                      |                         |           |      |         |                           |           |      |         |
| Well-Differentiated               | 1.00                    | Reference |      |         | 1.00                      | Reference |      |         |
| Moderately-Differentiated         | 1.33                    | 1.12      | 1.59 | 0.002   | 1.40                      | 1.14      | 1.74 | 0.002   |
| Poorly-Differentiated             | 1.58                    | 1.32      | 1.88 | 0.000   | 1.61                      | 1.30      | 1.98 | 0.000   |
| Undifferentiated                  | 1.61                    | 1.18      | 2.19 | 0.002   | 1.73                      | 1.19      | 2.53 | 0.004   |
| <b>Histology</b>                  |                         |           |      |         |                           |           |      |         |
| Adenocarcinoma                    | 1.00                    | Reference |      |         | 1.00                      | Reference |      |         |
| SCC                               | 0.92                    | 0.84      | 1.00 | 0.059   | 1.10                      | 0.97      | 1.24 | 0.155   |
| <b>LVSI</b>                       |                         |           |      |         |                           |           |      |         |
| Negative                          | 1.00                    | Reference |      |         | 1.00                      | Reference |      |         |
| Positive                          | 1.84                    | 1.61      | 2.09 | 0.000   | 1.23                      | 1.05      | 1.43 | 0.009   |
| Unknown                           | 1.05                    | 0.97      | 1.13 | 0.226   | 1.10                      | 1.00      | 1.21 | 0.046   |
| <b>Margin Status</b>              |                         |           |      |         |                           |           |      |         |
| Negative Margins                  | 1.00                    | Reference |      |         | 1.00                      | Reference |      |         |
| Positive Margins                  | 2.22                    | 1.90      | 2.60 | 0.000   | 1.63                      | 1.36      | 1.96 | 0.000   |
| <b>Pathologic T-Stage</b>         |                         |           |      |         |                           |           |      |         |
| T0                                | 1.00                    | Reference |      |         | 1.00                      | Reference |      |         |
| T1                                | 1.08                    | 0.95      | 1.23 | 0.244   | 0.99                      | 0.86      | 1.15 | 0.919   |
| T2                                | 1.31                    | 1.16      | 1.49 | 0.000   | 1.12                      | 0.97      | 1.29 | 0.116   |
| T3                                | 1.87                    | 1.68      | 2.08 | 0.000   | 1.40                      | 1.24      | 1.59 | 0.000   |
| T4                                | 2.76                    | 2.05      | 3.72 | 0.000   | 1.43                      | 0.99      | 2.06 | 0.057   |
| <b>Pathologic N-Stage</b>         |                         |           |      |         |                           |           |      |         |
| ypN0                              | 1.00                    | Reference |      |         | 1.00                      | Reference |      |         |
| N1                                | 1.68                    | 1.55      | 1.81 | 0.000   | 1.49                      | 1.36      | 1.64 | 0.000   |
| N2                                | 2.00                    | 1.74      | 2.30 | 0.000   | 1.76                      | 1.50      | 2.07 | 0.000   |
| N3                                | 2.87                    | 2.32      | 3.56 | 0.000   | 2.44                      | 1.91      | 3.11 | 0.000   |
| <b>Chemotherapy Regimen</b>       |                         |           |      |         |                           |           |      |         |
| Neoadjuvant                       | 1.00                    | Reference |      |         | 1.00                      | Reference |      |         |
| Neoadjuvant + Adjuvant            | 0.95                    | 0.84      | 1.07 | 0.383   | 0.77                      | 0.66      | 0.89 | 0.000   |
| <b>Radiation Dose</b>             |                         |           |      |         |                           |           |      |         |
| Per 1 cGy increase                | 1.00                    | 1.00      | 1.00 | 0.823   |                           |           |      |         |

CI, confidence interval; SCC, squamous cell carcinoma; LVSI, lymphovascular space invasion; cGy, centigray.
