# Supplementary material for: Benefit of adjuvant chemotherapy based on lymph node involvement for oesophageal cancer following trimodality therapy
Source: PubMed Central journal article supplement — ESMO Open. 2018 Jul 25;3(5):e000386. doi: 10.1136/esmoopen-2018-000386 (PMC6069924; doi:10.1136/esmoopen-2018-000386), 2018-07-25
Supplement: esmoopen-2018-000386supp002.pdf [file esmoopen-2018-000386supp002.pdf]

**Supplemental Table 2: Cox regression analysis for cNany and pN0 or pN+ subgroups**

|                            | cNany/pN0               |           |      |         |                           |           |      |         | cNany/pN+               |           |      |         |                           |           |      |         |
|----------------------------|-------------------------|-----------|------|---------|---------------------------|-----------|------|---------|-------------------------|-----------|------|---------|---------------------------|-----------|------|---------|
|                            | Cox Univariate Analysis |           |      |         | Cox Multivariate Analysis |           |      |         | Cox Univariate Analysis |           |      |         | Cox Multivariate Analysis |           |      |         |
|                            | HR                      | 95% CI    |      | p-value | HR                        | 95% CI    |      | p-value | HR                      | 95% CI    |      | p-value | HR                        | 95% CI    |      | p-value |
| Age at Diagnosis, years    |                         |           |      |         |                           |           |      |         |                         |           |      |         |                           |           |      |         |
| Per 1-year increase        | 1.02                    | 1.02      | 1.03 | 0.000   | 1.02                      | 1.01      | 1.03 | 0.000   | 1.01                    | 1.01      | 1.02 | 0.000   | 1.010                     | 1.01      | 1.02 | 0.000   |
| Gender                     |                         |           |      |         |                           |           |      |         |                         |           |      |         |                           |           |      |         |
| Male                       | 1.00                    | Reference |      |         | 1.00                      | Reference |      |         | 1.00                    | Reference |      |         |                           |           |      |         |
| Female                     | 0.83                    | 0.72      | 0.95 | 0.009   | 0.85                      | 0.72      | 0.99 | 0.039   | 0.95                    | 0.81      | 1.11 | 0.522   |                           |           |      |         |
| Charlson Comorbidity Score |                         |           |      |         |                           |           |      |         |                         |           |      |         |                           |           |      |         |
| 0                          | 1.00                    | Reference |      |         | 1.00                      | Reference |      |         | 1.00                    | Reference |      |         | 1.00                      | Reference |      |         |
| 1                          | 1.24                    | 1.11      | 1.40 | 0.000   | 1.21                      | 1.06      | 1.38 | 0.004   | 1.08                    | 0.95      | 1.23 | 0.234   | 1.03                      | 0.90      | 1.18 | 0.660   |
| ≥ 2                        | 1.25                    | 1.01      | 1.55 | 0.038   | 1.29                      | 1.02      | 1.64 | 0.032   | 1.48                    | 1.17      | 1.87 | 0.001   | 1.36                      | 1.06      | 1.75 | 0.016   |
| Grade                      |                         |           |      |         |                           |           |      |         |                         |           |      |         |                           |           |      |         |
| Well-Differentiated        | 1.00                    | Reference |      |         | 1.00                      | Reference |      |         | 1.00                    | Reference |      |         |                           |           |      |         |
| Moderately-Differentiated  | 1.74                    | 1.33      | 2.26 | 0.000   | 1.71                      | 1.30      | 2.26 | 0.000   | 1.01                    | 0.73      | 1.38 | 0.974   |                           |           |      |         |
| Poorly-Differentiated      | 1.97                    | 1.51      | 2.57 | 0.000   | 1.90                      | 1.45      | 2.50 | 0.000   | 1.26                    | 0.92      | 1.72 | 0.144   |                           |           |      |         |
| Undifferentiated           | 2.36                    | 1.48      | 3.77 | 0.000   | 2.16                      | 1.32      | 3.55 | 0.002   | 1.27                    | 0.74      | 2.16 | 0.382   |                           |           |      |         |
| Histology                  |                         |           |      |         |                           |           |      |         |                         |           |      |         |                           |           |      |         |
| Adenocarcinoma             | 1.00                    | Reference |      |         |                           |           |      |         | 1.00                    | Reference |      |         |                           |           |      |         |
| SCC                        | 1.03                    | 0.90      | 1.16 | 0.691   |                           |           |      |         | 0.92                    | 0.77      | 1.09 | 0.351   |                           |           |      |         |
| LVSI                       |                         |           |      |         |                           |           |      |         |                         |           |      |         |                           |           |      |         |
| Negative                   | 1.00                    | Reference |      |         |                           |           |      |         | 1.00                    | Reference |      |         | 1.00                      | Reference |      |         |
| Positive                   | 1.28                    | 0.98      | 1.67 | 0.066   |                           |           |      |         | 1.67                    | 1.41      | 1.99 | 0.000   | 1.45                      | 1.21      | 1.74 | 0.000   |
| Unknown                    | 0.98                    | 0.88      | 1.09 | 0.677   |                           |           |      |         | 1.12                    | 0.98      | 1.27 | 0.088   | 1.18                      | 1.03      | 1.36 | 0.017   |
| Margin Status              |                         |           |      |         |                           |           |      |         |                         |           |      |         |                           |           |      |         |
| Negative Margins           | 1.00                    | Reference |      |         | 1.00                      | Reference |      |         | 1.00                    | Reference |      |         | 1.00                      | Reference |      |         |
| Positive Margins           | 1.75                    | 1.31      | 2.34 | 0.000   | 1.63                      | 1.20      | 2.22 | 0.002   | 1.89                    | 1.54      | 2.33 | 0.000   | 1.69                      | 1.36      | 2.09 | 0.000   |
| Pathologic T-Stage         |                         |           |      |         |                           |           |      |         |                         |           |      |         |                           |           |      |         |
| T0                         | 1.00                    | Reference |      |         | 1.00                      | Reference |      |         | 1.00                    | Reference |      |         | 1.00                      | Reference |      |         |
| T1                         | 1.02                    | 0.88      | 1.19 | 0.757   | 0.99                      | 0.84      | 1.16 | 0.872   | 1.07                    | 0.82      | 1.40 | 0.602   | 1.03                      | 0.79      | 1.36 | 0.806   |

|                        |      |           |      |       |      |           |      |       |      |           |      |       |      |           |      |       |
|------------------------|------|-----------|------|-------|------|-----------|------|-------|------|-----------|------|-------|------|-----------|------|-------|
| T2                     | 1.26 | 1.09      | 1.47 | 0.002 | 1.14 | 0.97      | 1.35 | 0.108 | 1.09 | 0.85      | 1.39 | 0.491 | 1.07 | 0.84      | 1.37 | 0.588 |
| T3                     | 1.58 | 1.38      | 1.82 | 0.000 | 1.42 | 1.22      | 1.65 | 0.000 | 1.51 | 1.21      | 1.87 | 0.000 | 1.34 | 1.08      | 1.68 | 0.009 |
| T4                     | 2.12 | 1.24      | 3.62 | 0.006 | 1.53 | 0.81      | 2.87 | 0.190 | 2.11 | 1.41      | 3.16 | 0.000 | 1.55 | 1.00      | 2.40 | 0.049 |
| Pathologic N-Stage     |      |           |      |       |      |           |      |       |      |           |      |       |      |           |      |       |
| N1                     | NA   |           |      |       | NA   |           |      |       | 1.00 | Reference |      |       | 1.00 | Reference |      |       |
| N2                     | NA   |           |      |       | NA   |           |      |       | 1.18 | 1.03      | 1.37 | 0.019 | 1.17 | 1.00      | 1.36 | 0.057 |
| N3                     | NA   |           |      |       | NA   |           |      |       | 1.71 | 1.37      | 2.12 | 0.000 | 1.54 | 1.21      | 1.96 | 0.000 |
| Chemotherapy Regimen   |      |           |      |       |      |           |      |       |      |           |      |       |      |           |      |       |
| Neoadjuvant            | 1.00 | Reference |      |       |
| Neoadjuvant + Adjuvant | 0.72 | 0.54      | 0.95 | 0.020 | 0.65 | 0.47      | 0.89 | 0.007 | 0.78 | 0.67      | 0.91 | 0.002 | 0.80 | 0.68      | 0.94 | 0.008 |
| Radiation Dose, Gy     |      |           |      |       |      |           |      |       |      |           |      |       |      |           |      |       |
| Per 0.01-Gy increase   | 1.00 | 1.00      | 1.00 | 0.001 | 1.00 | 1.00      | 1.00 | 0.036 | 1.00 | 1.00      | 1.00 | 0.050 | 1.00 | 1.00      | 1.00 | 0.064 |

Abbreviations: HR, hazard ratio; CI, confidence interval; SCC, squamous cell carcinoma; LVSI, lymphovascular space invasion; Gy, Gray
