# Supplementary material for: Benefit of adjuvant chemotherapy based on lymph node involvement for oesophageal cancer following trimodality therapy
Source: PubMed Central journal article supplement — ESMO Open. 2018 Jul 25;3(5):e000386. doi: 10.1136/esmoopen-2018-000386 (PMC6069924; doi:10.1136/esmoopen-2018-000386), 2018-07-25
Supplement: esmoopen-2018-000386supp003.pdf [file esmoopen-2018-000386supp003.pdf]

**Supplementary Table 3.** Cox regression analysis for the cN+ subgroups

|                            | cN+/pN+                 |           |      |         |                           |           |      |         | cN+/pN0                 |           |      |         |                           |           |      |         |
|----------------------------|-------------------------|-----------|------|---------|---------------------------|-----------|------|---------|-------------------------|-----------|------|---------|---------------------------|-----------|------|---------|
|                            | Cox Univariate Analysis |           |      |         | Cox Multivariate Analysis |           |      |         | Cox Univariate Analysis |           |      |         | Cox Multivariate Analysis |           |      |         |
|                            | HR                      | 95% CI    |      | p-value | HR                        | 95% CI    |      | p-value | HR                      | 95% CI    |      | p-value | HR                        | 95% CI    |      | p-value |
| Age at Diagnosis, years    |                         |           |      |         |                           |           |      |         |                         |           |      |         |                           |           |      |         |
| Per 1-year increase        | 1.02                    | 1.01      | 1.02 | 0.000   | 1.02                      | 1.01      | 1.02 | 0.000   | 1.02                    | 1.01      | 1.03 | 0.000   | 1.020                     | 1.01      | 1.03 | 0.000   |
| Gender                     |                         |           |      |         |                           |           |      |         |                         |           |      |         |                           |           |      |         |
| Male                       | 1.00                    | Reference |      |         |                           |           |      |         | 1.00                    | Reference |      |         |                           |           |      |         |
| Female                     | 0.93                    | 0.77      | 1.12 | 0.437   |                           |           |      |         | 0.87                    | 0.72      | 1.06 | 0.164   |                           |           |      |         |
| Charlson Comorbidity Score |                         |           |      |         |                           |           |      |         |                         |           |      |         |                           |           |      |         |
| 0                          | 1.00                    | Reference |      |         | 1.00                      | Reference |      |         | 1.00                    | Reference |      |         |                           |           |      |         |
| 1                          | 1.10                    | 0.94      | 1.28 | 0.260   | 1.06                      | 0.90      | 1.26 | 0.477   | 1.17                    | 1.00      | 1.37 | 0.048   |                           |           |      |         |
| ≥ 2                        | 1.52                    | 1.15      | 2.01 | 0.003   | 1.34                      | 0.99      | 1.80 | 0.057   | 1.10                    | 0.81      | 1.49 | 0.540   |                           |           |      |         |
| Grade                      |                         |           |      |         |                           |           |      |         |                         |           |      |         |                           |           |      |         |
| Well-Differentiated        | 1.00                    | Reference |      |         |                           |           |      |         | 1.00                    | Reference |      |         | 1.00                      | Reference |      |         |
| Moderately-Differentiated  | 0.86                    | 0.58      | 1.26 | 0.427   |                           |           |      |         | 1.53                    | 1.06      | 2.21 | 0.024   | 1.58                      | 1.07      | 2.33 | 0.021   |
| Poorly-Differentiated      | 1.06                    | 0.72      | 1.55 | 0.779   |                           |           |      |         | 1.74                    | 1.20      | 2.50 | 0.003   | 1.76                      | 1.20      | 2.58 | 0.004   |
| Undifferentiated           | 1.18                    | 0.60      | 2.32 | 0.635   |                           |           |      |         | 3.30                    | 1.72      | 6.31 | 0.000   | 2.93                      | 1.51      | 5.69 | 0.001   |
| Histology                  |                         |           |      |         |                           |           |      |         |                         |           |      |         |                           |           |      |         |
| Adenocarcinoma             | 1.00                    | Reference |      |         |                           |           |      |         | 1.00                    | Reference |      |         |                           |           |      |         |
| SCC                        | 0.98                    | 0.80      | 1.21 | 0.865   |                           |           |      |         | 0.97                    | 0.81      | 1.15 | 0.691   |                           |           |      |         |
| LVSI                       |                         |           |      |         |                           |           |      |         |                         |           |      |         |                           |           |      |         |
| Negative                   | 1.00                    | Reference |      |         | 1.00                      | Reference |      |         | 1.00                    | Reference |      |         |                           |           |      |         |
| Positive                   | 1.53                    | 1.25      | 1.87 | 0.000   | 1.32                      | 1.06      | 1.64 | 0.011   | 1.48                    | 1.05      | 2.10 | 0.025   |                           |           |      |         |
| Unknown                    | 1.08                    | 0.93      | 1.26 | 0.294   | 1.18                      | 1.01      | 1.39 | 0.043   | 0.92                    | 0.80      | 1.07 | 0.274   |                           |           |      |         |
| Margin Status              |                         |           |      |         |                           |           |      |         |                         |           |      |         |                           |           |      |         |
| Negative Margins           | 1.00                    | Reference |      |         | 1.00                      | Reference |      |         | 1.00                    | Reference |      |         | 1.00                      | Reference |      |         |
| Positive Margins           | 1.95                    | 1.50      | 2.54 | 0.000   | 1.64                      | 1.24      | 2.16 | 0.001   | 1.69                    | 1.15      | 2.47 | 0.008   | 1.56                      | 1.04      | 2.32 | 0.030   |
| Pathologic T-Stage         |                         |           |      |         |                           |           |      |         |                         |           |      |         |                           |           |      |         |
| ypT0                       | 1.00                    | Reference |      |         | 1.00                      | Reference |      |         | 1.00                    | Reference |      |         | 1.00                      | Reference |      |         |
| ypT1                       | 1.05                    | 0.76      | 1.45 | 0.758   | 1.02                      | 0.74      | 1.41 | 0.899   | 1.05                    | 0.85      | 1.29 | 0.656   | 1.00                      | 0.80      | 1.25 | 0.990   |
| ypT2                       | 1.22                    | 0.92      | 1.63 | 0.168   | 1.22                      | 0.91      | 1.63 | 0.185   | 1.31                    | 1.08      | 1.60 | 0.006   | 1.26                      | 1.02      | 1.56 | 0.033   |

|                        |      |           |      |       |      |           |      |       |      |           |      |       |      |           |      |       |
|------------------------|------|-----------|------|-------|------|-----------|------|-------|------|-----------|------|-------|------|-----------|------|-------|
| ypT3                   | 1.69 | 1.32      | 2.17 | 0.000 | 1.53 | 1.19      | 1.98 | 0.001 | 1.80 | 1.51      | 2.15 | 0.000 | 1.60 | 1.31      | 1.96 | 0.000 |
| ypT4                   | 1.98 | 1.19      | 3.29 | 0.009 | 1.51 | 0.86      | 2.64 | 0.147 | 1.98 | 0.94      | 4.21 | 0.074 | 1.87 | 0.83      | 4.22 | 0.131 |
| Pathologic N-Stage     |      |           |      |       |      |           |      |       |      |           |      |       |      |           |      |       |
| ypN1                   | 1.00 | Reference |      |       | 1.00 | Reference |      |       |      |           |      |       |      |           |      |       |
| ypN2                   | 1.16 | 0.98      | 1.36 | 0.084 | 1.11 | 0.93      | 1.33 | 0.258 |      |           |      |       |      |           |      |       |
| ypN3                   | 1.74 | 1.37      | 2.21 | 0.000 | 1.55 | 1.18      | 2.03 | 0.002 |      |           |      |       |      |           |      |       |
| Chemotherapy Regimen   |      |           |      |       |      |           |      |       |      |           |      |       |      |           |      |       |
| Neoadjuvant            | 1.00 | Reference |      |       |
| Neoadjuvant + Adjuvant | 0.79 | 0.65      | 0.94 | 0.010 | 0.82 | 0.67      | 1.00 | 0.048 | 0.65 | 0.45      | 0.94 | 0.021 | 0.59 | 0.39      | 0.88 | 0.009 |
| Radiation Dose, Gy     |      |           |      |       |      |           |      |       |      |           |      |       |      |           |      |       |
| Per 0.01-Gy increase   | 1.00 | 1.00      | 1.00 | 0.134 |      |           |      |       | 1.00 | 1.00      | 1.00 | 0.079 | 1.00 | 1.00      | 1.00 | 0.104 |

HR, hazard ratio; CI, confidence interval; SCC, squamous cell carcinoma; LVSI, lymphovascular space invasion; Gy, gray.
