# Supplementary material for: Benefit of adjuvant chemotherapy based on lymph node involvement for oesophageal cancer following trimodality therapy
Source: PubMed Central journal article supplement — ESMO Open. 2018 Jul 25;3(5):e000386. doi: 10.1136/esmoopen-2018-000386 (PMC6069924; doi:10.1136/esmoopen-2018-000386), 2018-07-25
Supplement: esmoopen-2018-000386supp004.pdf [file esmoopen-2018-000386supp004.pdf]

**Supplementary Table 4.** Cox regression analysis for the cNO subgroups

|                            | cNO/pN+                 |           |      |         |                           |           |      |         | cNO/pNO                 |           |      |         |                           |           |      |         |
|----------------------------|-------------------------|-----------|------|---------|---------------------------|-----------|------|---------|-------------------------|-----------|------|---------|---------------------------|-----------|------|---------|
|                            | Cox Univariate Analysis |           |      |         | Cox Multivariate Analysis |           |      |         | Cox Univariate Analysis |           |      |         | Cox Multivariate Analysis |           |      |         |
|                            | HR                      | 95% CI    |      | p-value | HR                        | 95% CI    |      | p-value | HR                      | 95% CI    |      | p-value | HR                        | 95% CI    |      | p-value |
| Age at Diagnosis, years    |                         |           |      |         |                           |           |      |         |                         |           |      |         |                           |           |      |         |
| Per 1-year increase        | 1.01                    | 1.00      | 1.02 | 0.189   | 1.01                      | 1.00      | 1.03 | 0.111   | 1.03                    | 1.02      | 1.04 | 0.000   | 1.03                      | 1.02      | 1.04 | 0.000   |
| Gender                     |                         |           |      |         |                           |           |      |         |                         |           |      |         |                           |           |      |         |
| Male                       | 1.00                    | Reference |      |         |                           |           |      |         | 1.00                    | Reference |      |         | 1.00                      | Reference |      |         |
| Female                     | 1.24                    | 0.92      | 1.67 | 0.150   |                           |           |      |         | 0.81                    | 0.65      | 1.01 | 0.056   | 0.76                      | 0.59      | 0.99 | 0.044   |
| Charlson Comorbidity Score |                         |           |      |         |                           |           |      |         |                         |           |      |         |                           |           |      |         |
| 0                          | 1.00                    | Reference |      |         |                           |           |      |         | 1.00                    | Reference |      |         |                           |           |      |         |
| 1                          | 1.16                    | 0.89      | 1.50 | 0.275   |                           |           |      |         | 1.36                    | 1.13      | 1.63 | 0.001   | 1.31                      | 1.07      | 1.62 | 0.011   |
| ≥ 2                        | 1.38                    | 0.88      | 2.15 | 0.161   |                           |           |      |         | 1.36                    | 0.98      | 1.88 | 0.068   | 1.56                      | 1.09      | 2.23 | 0.016   |
| Grade                      |                         |           |      |         |                           |           |      |         |                         |           |      |         |                           |           |      |         |
| Well-Differentiated        | 1.00                    | Reference |      |         | 1.00                      | Reference |      |         | 1.00                    | Reference |      |         | 1.00                      | Reference |      |         |
| Moderately-Differentiated  | 1.37                    | 0.76      | 2.48 | 0.298   | 1.38                      | 0.74      | 2.58 | 0.318   | 1.78                    | 1.18      | 2.69 | 0.006   | 1.78                      | 1.17      | 2.72 | 0.008   |
| Poorly-Differentiated      | 1.54                    | 0.85      | 2.77 | 0.153   | 1.47                      | 0.79      | 2.74 | 0.228   | 1.98                    | 1.31      | 2.98 | 0.001   | 1.95                      | 1.28      | 2.98 | 0.002   |
| Undifferentiated           | 1.93                    | 0.79      | 4.73 | 0.150   | 1.95                      | 0.78      | 4.88 | 0.152   | 1.85                    | 0.91      | 3.77 | 0.088   | 1.56                      | 0.70      | 3.52 | 0.278   |
| Histology                  |                         |           |      |         |                           |           |      |         |                         |           |      |         |                           |           |      |         |
| Adenocarcinoma             | 1.00                    | Reference |      |         |                           |           |      |         | 1.00                    | Reference |      |         | 1.00                      | Reference |      |         |
| SCC                        | 1.02                    | 0.71      | 1.45 | 0.933   |                           |           |      |         | 1.14                    | 0.93      | 1.40 | 0.218   | 1.24                      | 0.96      | 1.60 | 0.095   |
| LVSI                       |                         |           |      |         |                           |           |      |         |                         |           |      |         |                           |           |      |         |
| Negative                   | 1.00                    | Reference |      |         | 1.00                      | Reference |      |         | 1.00                    | Reference |      |         |                           |           |      |         |
| Positive                   | 2.17                    | 1.54      | 3.07 | 0.000   | 1.99                      | 1.34      | 2.95 | 0.001   | 1.04                    | 0.67      | 1.63 | 0.850   |                           |           |      |         |
| Unknown                    | 1.39                    | 1.05      | 1.83 | 0.022   | 1.60                      | 1.15      | 2.21 | 0.005   | 1.01                    | 0.85      | 1.19 | 0.945   |                           |           |      |         |
| Margin Status              |                         |           |      |         |                           |           |      |         |                         |           |      |         |                           |           |      |         |
| Negative Margins           | 1.00                    | Reference |      |         | 1.00                      | Reference |      |         | 1.00                    | Reference |      |         | 1.00                      | Reference |      |         |
| Positive Margins           | 2.07                    | 1.45      | 2.94 | 0.000   | 2.07                      | 1.41      | 3.06 | 0.000   | 1.91                    | 1.21      | 3.02 | 0.005   | 1.79                      | 1.07      | 2.99 | 0.027   |
| Pathologic T-Stage         |                         |           |      |         |                           |           |      |         |                         |           |      |         |                           |           |      |         |
| ypT0                       | 1.00                    | Reference |      |         |                           |           |      |         | 1.00                    | Reference |      |         | 1.00                      | Reference |      |         |
| ypT1                       | 1.05                    | 0.60      | 1.84 | 0.873   |                           |           |      |         | 0.99                    | 0.77      | 1.26 | 0.917   | 0.97                      | 0.74      | 1.28 | 0.839   |
| ypT2                       | 0.82                    | 0.47      | 1.42 | 0.479   |                           |           |      |         | 1.26                    | 0.99      | 1.61 | 0.065   | 1.09                      | 0.82      | 1.44 | 0.557   |

|                        |      |           |      |       |      |           |      |       |       |           |      |       |       |      |      |       |
|------------------------|------|-----------|------|-------|------|-----------|------|-------|-------|-----------|------|-------|-------|------|------|-------|
| ypT3                   | 1.18 | 0.73      | 1.91 | 0.504 |      | 1.44      | 1.15 | 1.80  | 0.002 | 1.31      | 1.01 | 1.69  | 0.040 |      |      |       |
| ypT4                   | 2.02 | 0.88      | 4.66 | 0.099 |      | 1.97      | 0.87 | 4.49  | 0.105 | 1.24      | 0.45 | 3.43  | 0.673 |      |      |       |
| Pathologic N-Stage     |      |           |      |       |      |           |      |       |       |           |      |       |       |      |      |       |
| ypN1                   | 1.00 | Reference |      |       | 1.00 | Reference |      |       |       |           |      |       |       |      |      |       |
| ypN2                   | 1.42 | 1.05      | 1.92 | 0.022 | 1.53 | 1.06      | 2.20 | 0.023 |       |           |      |       |       |      |      |       |
| ypN3                   | 1.52 | 0.87      | 2.65 | 0.144 | 2.04 | 1.11      | 3.74 | 0.022 |       |           |      |       |       |      |      |       |
| Chemotherapy Regimen   |      |           |      |       |      |           |      |       |       |           |      |       |       |      |      |       |
| Neoadjuvant            | 1.00 | Reference |      |       | 1.00 | Reference |      |       | 1.00  | Reference |      |       |       |      |      |       |
| Neoadjuvant + Adjuvant | 0.76 | 0.56      | 1.03 | 0.078 | 0.76 | 0.54      | 1.06 | 0.105 | 0.76  | 0.47      | 1.22 | 0.255 | 0.73  | 0.41 | 1.30 | 0.280 |
| Radiation Dose, Gy     |      |           |      |       |      |           |      |       |       |           |      |       |       |      |      |       |
| Per 0.01-Gy increase   | 1.00 | 1.00      | 1.00 | 0.356 |      |           |      |       | 1.00  | 1.00      | 1.00 | 0.009 |       |      |      |       |

HR, hazard ratio; CI, confidence interval; SCC, squamous cell carcinoma; LVSI, lymphovascular space invasion; Gy, gray.
